# Supplementary material for: Clinical and molecular response to tebentafusp in previously treated patients with metastatic uveal melanoma: a phase 2 trial
Source: PubMed Central journal article supplement (PMC9671803; doi:10.1038/s41591-022-02015-7), 2022-10-13
Supplement: 41591_2022_2015_MOESM1_ESM.pdf [file 41591_2022_2015_MOESM1_ESM.pdf]

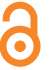

---

# Clinical and molecular response to tebentafusp in previously treated patients with metastatic uveal melanoma: a phase 2 trial

---

In the format provided by the authors and unedited

---

## Supplementary Information

This appendix is a supplement to: Carvajal RD, Butler MO, Shoushtari A.N., et al. Clinical and molecular response to tebentafusp in previously treated patients with metastatic uveal melanoma

Clinical trial registration number: NCT02570308

## Supplemental Tables

**Supplementary Table 1: Composite terms for skin toxicity**

| <b>Skin toxicity group</b>                 | <b>No. (%) of Patients with Event (N=127)</b> | <b>Skin toxicity group</b> | <b>No. (%) of Patients with Event (N=127)</b> |
|--------------------------------------------|-----------------------------------------------|----------------------------|-----------------------------------------------|
| <b>Rash</b>                                |                                               | <b>Dry skin</b>            |                                               |
| Blister                                    | 2 (2)                                         | Dry skin                   | 52 (41)                                       |
| Dermatitis acneiform                       | 8 (6)                                         | <b>Edema</b>               |                                               |
| Dermatitis allergic                        | 2 (2)                                         | Eyelid oedema              | 2 (2)                                         |
| Dermatitis bullous                         | 1 (1)                                         | Periorbital oedema         | 34 (27)                                       |
| Palmar-plantar erythrodysesthesia syndrome | 2 (2)                                         | Skin tightness             | 2 (2)                                         |
| Papule                                     | 1 (1)                                         | Swelling face              | 2 (2)                                         |
| Rash                                       | 42 (33)                                       | <b>Other changes</b>       |                                               |
| Rash erythematous                          | 6 (5)                                         | Alopecia                   | 12 (9)                                        |
| Rash generalised                           | 30 (24)                                       | Hyperhidrosis              | 4 (3)                                         |
| Rash maculo-papular                        | 51 (40)                                       | Night sweats               | 11 (9)                                        |
| Rash papular                               | 1 (1)                                         | Skin mass                  | 11 (9)                                        |
| Rash pruritic                              | 5 (4)                                         |                            |                                               |
| Skin exfoliation                           | 28 (22)                                       |                            |                                               |
| Urticaria                                  | 2 (2)                                         |                            |                                               |
| <b>Pruritus</b>                            |                                               |                            |                                               |
| Pain of skin                               | 3 (2)                                         |                            |                                               |
| Pruritus                                   | 87 (69)                                       |                            |                                               |
| Pruritus generalised                       | 22 (17)                                       |                            |                                               |
| Eye pruritus                               | 5 (4)                                         |                            |                                               |
| Skin burning sensation                     | 1 (1)                                         |                            |                                               |
| <b>Pigment change</b>                      |                                               |                            |                                               |
| Ephelides                                  | 2 (2)                                         |                            |                                               |
| Eyelash discolouration                     | 2 (2)                                         |                            |                                               |
| Eyelash hypopigmentation                   | 2 (2)                                         |                            |                                               |
| Hair colour changes                        | 34 (27)                                       |                            |                                               |
| Skin hyperpigmentation                     | 21 (17)                                       |                            |                                               |
| Skin hypopigmentation                      | 25 (20)                                       |                            |                                               |
| Solar lentigo                              | 1 (1)                                         |                            |                                               |
| Vitiligo                                   | 7 (6)                                         |                            |                                               |
| <b>Erythema</b>                            |                                               |                            |                                               |
| Erythema                                   | 22 (17)                                       |                            |                                               |
| Generalised erythema                       | 20 (16)                                       |                            |                                               |
| Photosensitivity reaction                  | 2 (2)                                         |                            |                                               |

**Supplementary Table 2. Treatment-emergent adverse events (≥10%) by system organ class**

| System organ class/<br>Preferred term | No. (%) of Patients<br>with Event (N=127) | System organ class/<br>Preferred term              | No. (%) of Patients<br>with Event (N=127) |
|---------------------------------------|-------------------------------------------|----------------------------------------------------|-------------------------------------------|
| Number of patients with any TEAE      | 127 (100%)                                | Musculoskeletal and<br>connective tissue disorders | 91 (72%)                                  |
| Blood and lymphatic system disorders  | 24 (19%)                                  | Back pain                                          | 41 (32%)                                  |
| Anaemia                               | 17 (13%)                                  | Arthralgia                                         | 33 (26%)                                  |
| Cardiac disorders                     | 38 (30%)                                  | Myalgia                                            | 23 (18%)                                  |
| Tachycardia                           | 15 (12%)                                  | Pain in extremity                                  | 19 (15%)                                  |
| Eye disorders                         | 68 (54%)                                  | Nervous system disorders                           | 75 (59%)                                  |
| Periorbital oedema                    | 34 (27%)                                  | Headache                                           | 42 (33%)                                  |
| Gastrointestinal disorders            | 113 (89%)                                 | Dizziness                                          | 21 (17%)                                  |
| Nausea                                | 86 (68%)                                  | Psychiatric disorders                              | 42 (33%)                                  |
| Vomiting                              | 52 (41%)                                  | Insomnia                                           | 20 (16%)                                  |
| Abdominal pain                        | 45 (35%)                                  | Anxiety                                            | 13 (10%)                                  |
| Diarrhoea                             | 33 (26%)                                  | Respiratory, thoracic and<br>mediastinal disorders | 69 (54%)                                  |
| Constipation                          | 30 (24%)                                  | Cough                                              | 29 (23%)                                  |
| Abdominal pain upper                  | 26 (21%)                                  | Dyspnoea                                           | 24 (19%)                                  |
| Gastroesophageal reflux disease       | 16 (13%)                                  | Oropharyngeal pain                                 | 13 (10%)                                  |
| Dyspepsia                             | 15 (12%)                                  | Skin and subcutaneous<br>tissue disorders          | 122 (96%)                                 |
| Abdominal distension                  | 14 (11%)                                  | Pruritus                                           | 87 (69%)                                  |
| General disorders                     | 124 (98%)                                 | Dry skin                                           | 52 (41%)                                  |
| Pyrexia                               | 103 (81%)                                 | Rash maculo-papular                                | 51 (40%)                                  |
| Chills                                | 84 (66%)                                  | Rash                                               | 42 (33%)                                  |
| Fatigue                               | 78 (61%)                                  | Hair colour changes                                | 34 (27%)                                  |
| Peripheral edema                      | 44 (35%)                                  | Rash generalised                                   | 30 (24%)                                  |
| Influenza like illness                | 23 (18%)                                  | Skin exfoliation                                   | 28 (22%)                                  |
| Face edema                            | 15 (12%)                                  | Skin hypopigmentation                              | 25 (20%)                                  |
| Infections and infestations           | 56 (44%)                                  | Erythema                                           | 22 (17%)                                  |
| Urinary tract infection               | 16 (13%)                                  | Pruritus generalised                               | 22 (17%)                                  |
| Nasopharyngitis                       | 13 (10%)                                  | Skin hyperpigmentation                             | 21 (17%)                                  |
| Investigations                        | 66 (52%)                                  | Generalised erythema                               | 20 (16%)                                  |
| Aspartate aminotransferase increased  | 23 (18%)                                  | Vascular disorders                                 | 79 (62%)                                  |
| Alanine aminotransferase increased    | 19 (15%)                                  | Hypotension                                        | 53 (42%)                                  |
| Weight decreased                      | 20 (16%)                                  | Hypertension                                       | 18 (14%)                                  |
| Blood alkaline phosphatase increased  | 13 (10%)                                  | Flushing                                           | 16 (13%)                                  |
| Metabolism and nutrition disorders    | 69 (54%)                                  | Hot flash                                          | 14 (11%)                                  |
| Decreased appetite                    | 32 (25%)                                  |                                                    |                                           |
| Hypophosphatemia                      | 14 (11%)                                  |                                                    |                                           |
| Hypokalemia                           | 14 (11%)                                  |                                                    |                                           |
| Hypomagnesemia                        | 13 (10%)                                  |                                                    |                                           |

MedDRA = Medical Dictionary for Regulatory Activities; N = Total number of patients; no. = number of patients with an observation; PT = preferred term; SOC = system organ class; TEAE = treatment-emergent AE. Patients with multiple TEAEs per SOC or PT are counted only once in each row. Adverse events were coded using MedDRA v22.0.

Treatment-emergent adverse events were defined as any adverse event with a start date from day of first dose of study drug up to 90 days after last dose of study drug or until start of alternative cancer therapy post-treatment discontinuation, whichever occurred first.

Number (%) of patients were sorted alphabetically for SOC and by descending frequency overall for PT. A patient could have had one or more PTs reported under a given SOC.

**Supplementary Table 3. Efficacy subgroup analyses**

| Subgroup                                     | ORR<br>No. (%; 95% CI) | DCR % (no.; 95% CI) |                  | Median<br>mo (95% CI) | PFS                   |                       | OS<br>1-yr rate (95%<br>CI) |
|----------------------------------------------|------------------------|---------------------|------------------|-----------------------|-----------------------|-----------------------|-----------------------------|
|                                              |                        | ≥16 Weeks           | ≥24 Weeks        |                       | 6-mo rate (95%<br>CI) | Median<br>mo (95% CI) |                             |
| <b>Age</b>                                   |                        |                     |                  |                       |                       |                       |                             |
| <65 (n=80)                                   | 6 (8%; 3-16%)          | 38% (30; 27-49%)    | 25% (20; 16-36%) | 2.8 (1.9-4.5)         | 29% (19-39%)          | 21.2 (14.1-34.2)      | 68% (56-77%)                |
| ≥65 (n=47)                                   | 0 (0%; 0-8%)           | 21% (10; 11-36%)    | 19% (9; 9-33%)   | 2.8 (1.8-3.6)         | 19% (10-31%)          | 12.8 (7.9-16.8)       | 51% (36-65%)                |
| <b>Sex</b>                                   |                        |                     |                  |                       |                       |                       |                             |
| Male (n=63)                                  | 2 (3%; 0-11%)          | 33% (21; 22-46%)    | 22% (14; 13-35%) | 3.1 (2.0-4.0)         | 23% (13-34%)          | 13.5 (11.3-17.7)      | 59% (46-70%)                |
| Female (n=64)                                | 4 (6%; 2-15%)          | 30% (19; 19-42%)    | 23% (15; 14-36%) | 2.0 (1.9-3.7)         | 27% (17-39%)          | 21.3 (12.2-NC)        | 64% (51-75%)                |
| <b>ECOG</b>                                  |                        |                     |                  |                       |                       |                       |                             |
| 0 (n=89)                                     | 3 (3%; 1-10%)          | 30% (27; 21-41%)    | 21% (19; 13-31%) | 2.8 (2.0-3.6)         | 23% (15-32%)          | 17.0 (12.9-34.2)      | 66% (55-75%)                |
| ≥1 (n=38)                                    | 3 (8%; 2-21%)          | 34% (13; 20-51%)    | 26% (10; 13-43%) | 3.5 (1.8-5.5)         | 30% (16-45%)          | 13.4 (7.4-22.5)       | 53% (36-68%)                |
| <b>Baseline ALC</b>                          |                        |                     |                  |                       |                       |                       |                             |
| <1.0 × 10 <sup>9</sup> /L (n=25)             | 0 (0%; 0-14%)          | 12% (3; 3-31%)      | 8% (2; 1-26%)    | 1.9 (1.8-1.9)         | 13% (3-29%)           | 10.3 (6.3-13.4)       | 42% (22-61%)                |
| ≥1.0 × 10 <sup>9</sup> /L (n=102)            | 6 (6%; 2-12%)          | 36% (37; 27-46%)    | 27% (27; 18-36%) | 3.6 (2.1-4.0)         | 28% (20-37%)          | 21.2 (13.8-NC)        | 66% (56-75%)                |
| <b>Baseline LDH</b>                          |                        |                     |                  |                       |                       |                       |                             |
| ≤ULN (n=53)                                  | 3 (6%; 1-16%)          | 38% (20; 25-52%)    | 32% (17; 20-46%) | 3.6 (2.1-5.5)         | 33% (21-46%)          | 28.6 (17.7-NC)        | 86% (73-93%)                |
| >ULN (n=74)                                  | 3 (4%; 1-11%)          | 27% (20; 17-39%)    | 16% (12; 9-27%)  | 1.9 (1.8-3.5)         | 19% (11-29%)          | 11.0 (7.4-13.1)       | 45% (33-56%)                |
| <b>Baseline ALP</b>                          |                        |                     |                  |                       |                       |                       |                             |
| ≤ULN (n=90)                                  | 6 (7%; 3-14%)          | 37% (33; 27-48%)    | 28% (25; 19-38%) | 3.6 (2.0-4.0)         | 30% (20-39%)          | 21.3 (16.8-NC)        | 73% (62-81%)                |
| >ULN (n=37)                                  | 0 (0%; 0-10%)          | 19% (7; 8-35%)      | 11% (4; 3-25%)   | 2.0 (1.8-3.0)         | 14% (5-27%)           | 8.5 (3.9-12.2)        | 35% (20-50%)                |
| <b>Largest target liver metastasis</b>       |                        |                     |                  |                       |                       |                       |                             |
| ≤3 cm (n=45)                                 | 2 (4%; 1-15%)          | 40% (18; 26-56%)    | 36% (16; 22-51%) | 3.6 (1.9-5.6)         | 36% (22-49%)          | 34.2 (17.0-34.2)      | 75% (60-86%)                |
| >3 - ≤ 8cm (n=50)                            | 2 (4%; 1-14%)          | 30% (15; 18-45%)    | 16% (8; 7-29%)   | 2.9 (1.8-3.8)         | 21% (11-33%)          | 13.4 (9.4-16.8)       | 60% (45-72%)                |
| >8cm (n=17)                                  | 1 (6%; 0-29%)          | 24% (4; 7-50%)      | 12% (2; 2-36%)   | 1.9 (1.7-3.8)         | 12% (2-31%)           | 9.4 (2.5-11.4)        | 25% (8-47%)                 |
| No liver metastases on target lesions (n=15) | 1 (7%; 0-32%)          | 20% (3; 4-48%)      | 20% (3; 4-48%)   | 3.4 (1.9-5.9)         | 21% (5-45%)           | 17.7 (6.1-NC)         | 67% (38-85%)                |
| <b>Prior therapy</b>                         |                        |                     |                  |                       |                       |                       |                             |
| Both systemic therapy and ≥1 LDT (n=36)      | 1 (3%; 0-15%)          | 33% (12; 19-51%)    | 28% (10; 14-45%) | 2.0 (1.9-4.0)         | 28% (15-43%)          | 21.3 (11.6-34.2)      | 67% (49-80%)                |
| Systemic therapy only (n=70)                 | 5 (7%; 2-16%)          | 34% (24; 23-47%)    | 23% (16; 14-34%) | 3.6 (1.9-4.0)         | 27% (17-37%)          | 14.1 (11.4-NC)        | 60% (47-71%)                |
| LDT only (n=21)                              | 0 (0%; 0-16%)          | 19% (4; 5-42%)      | 14% (3; 3-36%)   | 2.1 (1.9-3.7)         | 15% (4-34%)           | 13.5 (6.3-NC)         | 59% (35-77%)                |
| <b>Best response to prior therapy</b>        |                        |                     |                  |                       |                       |                       |                             |
| CR/PR (n=18)                                 | 2 (11%; 1-35%)         | 44% (8; 22-69%)     | 39% (7; 17-64%)  | 4.6 (1.9-14.7)        | 44% (20-66%)          | NC (11.6-NC)          | 72% (46-87%)                |
| SD (n=53)                                    | 0 (0%; 0-7%)           | 36% (19; 23-50%)    | 25% (13; 14-38%) | 3.5 (2.0-4.5)         | 26% (16-39%)          | 17.7 (12.8-28.6)      | 67% (52-78%)                |
| PD/NE/NA/missing (n=56)                      | 4 (7%; 2-17%)          | 23% (13; 13-36%)    | 16% (9; 8-28%)   | 1.9 (1.8-3.5)         | 18% (9-29%)           | 13.1 (10.3-16.8)      | 54% (39-66%)                |
| <b>Prior IO checkpoint inhibitors (CPI)</b>  |                        |                     |                  |                       |                       |                       |                             |
| Refractory* to prior CPI (n=61)              | 4 (7%; 2-16%)          | 25% (15; 15-37%)    | 20% (12; 11-32%) | 1.9 (1.8-3.6)         | 20% (11-31%)          | 14.1 (11.0-17.7)      | 60% (46-71%)                |
| Relapsed* following prior CPI (n=29)         | 2 (7%; 1-23%)          | 52% (15; 33-71%)    | 38% (11; 21-58%) | 5.5 (2.1-13.9)        | 41% (24-58%)          | 28.6 (13.4-NC)        | 76% (56-88%)                |
| No prior CPI (n=37)                          | 0 (0%; 0-10%)          | 27% (10; 14-44%)    | 16% (6; 6-32%)   | 2.1 (1.9-3.6)         | 19% (9-34%)           | 12.9 (7.4-NC)         | 54% (36-69%)                |
| <b>Prior immunotherapy</b>                   |                        |                     |                  |                       |                       |                       |                             |
| Yes (n=93)                                   | 6 (7%; 2-14%)          | 33% (31; 24-44%)    | 25% (23; 16-35%) | 2.8 (1.9-3.8)         | 26% (18-36%)          | 16.8 (12.8-22.5)      | 63% (52-72%)                |
| No (n=34)                                    | 0 (0%; 0-10%)          | 27% (9; 13-44%)     | 18% (6; 7-35%)   | 2.1 (1.9-3.6)         | 21% (9-36%)           | 13.5 (7.0-NC)         | 59% (40-74%)                |

\* Refractory defined as prior best response of PD; relapsed defined as prior best response of CR, PR or SD

CI = confidence interval, CR = complete response, DCR = disease control rate, IO = immuno-oncology, LDT = liver-directed therapy, mo = months, NA = not applicable, NC = not calculable, NE = not evaluable, ORR = objective response rate, OS = overall survival, PD = progressive disease, PFS = progression-free survival, PR = partial response, SD = stable disease,

**Supplementary Table 4. Variant allele frequency detected at baseline for a targeted panel of uveal specific mutations for ctDNA mutation profiling (n=96).**

| Gene    | HGVSp   | Frequency No. (%) | Total Frequency (%) | Median VAF (IQR range) | VAF min | VAF max |
|---------|---------|-------------------|---------------------|------------------------|---------|---------|
| GNAQ    | p.Q209L | 9 (9.38)          | 40                  | 3.24 (0.57-12.39)      | 0.1     | 29.6    |
|         | p.Q209P | 29 (30.21)        |                     | 7.87 (1.56-22.07)      | 0.1     | 31.4    |
| GNA11   | p.Q209L | 46 (47.92)        | 48                  | 3.86 (0.91-11.47)      | 0.0     | 37.0    |
| SF3B1   | p.K700E | 3 (3.12)          | 32                  | 0.94 (0.5-2.88)        | 0.1     | 4.8     |
|         | p.R625L | 5 (5.21)          |                     | 0.06 (0.02-0.11)       | 0.0     | 0.2     |
|         | p.R625H | 13 (13.54)        |                     | 8.43 (2.31-11.13)      | 0.1     | 30.4    |
|         | p.R625C | 10 (10.42)        |                     | 0.63 (0.25-2.19)       | 0.1     | 16.2    |
| PLCB4   | p.D630Y | 3 (3.12)          | 4                   | 0.07 (0.06-0.07)       | 0.1     | 0.1     |
|         | p.D630V | 1 (1.04)          |                     | 18.25 (18.25-18.25)    | 18.2    | 18.2    |
| CYSLTR2 | p.L129Q | 3 (3.12)          | 3                   | 0.91 (0.62-4.74)       | 0.3     | 8.6     |

VAF, variant allele frequency; IQR, interquartile range

**Supplementary Table 5. Specific mutations detected in ctDNA and matched tumour biopsies**

| SUBJID  | ctDNA               |                          | Tumour              |                          | SUBJID  | ctDNA          |                    | Tumour         |                    |
|---------|---------------------|--------------------------|---------------------|--------------------------|---------|----------------|--------------------|----------------|--------------------|
|         | Gene                | HGVSP                    | Gene                | HVGSP                    |         | Gene           | HGVSP              | Gene           | HVGSP              |
| 1022107 | GNA11               | p.Q209L                  | GNA11               | p.Q209L                  | 1029105 | GNAQ           | p.Q209P            | GNAQ           | p.Q209P            |
| 1023119 | GNAQ<br>SF3B1       | p.Q209P<br>p.R625H       | GNAQ<br>ND          | p.Q209P<br>ND            |         | SF3B1          | p.R625C            | SF3B1          | p.R625C            |
| 1023123 | GNA11<br>SF3B1      | p.Q209L<br>p.R625H       | GNA11<br>SF3B1      | p.Q209L<br>p.R625H       | 1021118 | GNA11          | p.Q209L            | GNA11          | p.Q209L            |
| 1023133 | GNAQ<br>SF3B1       | p.Q209P<br>p.R625C       | GNAQ<br>SF3B1       | p.Q209P<br>p.R625C       | 1036101 | GNAQ<br>SF3B1  | p.Q209P<br>p.R625C | GNAQ<br>ND     | p.Q209P<br>ND      |
| 1024117 | GNA11               | p.Q209L                  | GNA11               | p.Q209L                  | 1023128 | GNA11          | p.Q209L            | GNA11          | p.Q209L            |
| 1029102 | GNA11               | p.Q209L                  | GNA11               | p.Q209L                  | 1027105 | GNA11<br>SF3B1 | p.Q209L<br>p.R625C | GNA11<br>SF3B1 | p.Q209L<br>p.R625C |
| 1029104 | GNAQ                | p.Q209L                  | GNAQ                | p.Q209L                  | 1023131 | GNAQ           | p.Q209L            | GNAQ           | p.Q209L            |
| 1032105 | GNA11               | p.Q209L                  | GNA11               | p.Q209L                  | 1045101 | GNAQ<br>SF3B1  | p.Q209P<br>p.R625H | GNAQ<br>SF3B1  | p.Q209P<br>p.R625H |
| 1043104 | SF3B1               | p.R625C                  | SF3B1               | p.R625C                  | 1048102 | GNA11          | p.Q209L            | GNA11          | p.Q209L            |
| 1043106 | GNAQ                | p.Q209L                  | GNAQ                | p.Q209L                  | 1021123 | SF3B1<br>ND    | p.R625L<br>ND      | ND<br>GNAQ     | ND<br>p.Q209P      |
| 1047102 | GNA11<br>SF3B1      | p.Q209L<br>p.R625H       | GNA11<br>SF3B1      | p.Q209L<br>p.R625H       | 1035102 | GNA11          | p.Q209L            | ND             | ND                 |
| 1048103 | GNA11               | p.Q209L                  | GNA11               | p.Q209L                  | 1043102 | SF3B1          | p.R625L            | ND             | ND                 |
| 1048106 | GNAQ                | p.Q209P                  | GNAQ                | p.Q209P                  | 1023125 | GNAQ           | p.Q209P            | ND             | ND                 |
| 1023113 | CYSLTR2             | p.L129Q                  | CYSLTR2             | p.L129Q                  | 1023126 | GNAQ           | p.Q209P            | ND             | ND                 |
| 1023115 | CYSLTR2             | p.L129Q                  | CYSLTR2             | p.L129Q                  | 1028113 | GNAQ<br>SF3B1  | p.Q209P<br>p.R625H | ND<br>ND       | ND<br>ND           |
| 1023117 | GNAQ<br>SF3B1       | p.Q209P<br>p.K700E       | GNAQ<br>SF3B1       | p.Q209P<br>p.K700E       | 1031103 | GNAQ           | p.Q209P            | ND             | ND                 |
| 1023118 | GNAQ                | p.Q209L                  | GNAQ                | p.Q209L                  | 1052101 | GNA11<br>SF3B1 | p.Q209L<br>p.R625H | ND<br>ND       | ND<br>ND           |
| 1022109 | GNAQ                | p.Q209P                  | GNAQ                | p.Q209P                  |         |                |                    |                |                    |
| 1023120 | GNAQ                | p.Q209L                  | GNAQ                | p.Q209L                  |         |                |                    |                |                    |
| 1023122 | PLCB4               | p.D630Y                  | PLCB4               | p.D630Y                  |         |                |                    |                |                    |
| 1023127 | GNA11<br>GNAQ       | p.Q209L<br>p.Q209L       | GNA11<br>ND         | p.Q209L<br>ND            |         |                |                    |                |                    |
| 1023130 | GNAQ                | p.Q209P                  | GNAQ                | p.Q209P                  |         |                |                    |                |                    |
| 1031102 | GNA11               | p.Q209L                  | GNA11               | p.Q209L                  |         |                |                    |                |                    |
| 1032103 | GNAQ                | p.Q209P                  | GNAQ                | p.Q209P                  |         |                |                    |                |                    |
| 1045102 | GNA11               | p.Q209L                  | GNA11               | p.Q209L                  |         |                |                    |                |                    |
| 1043103 | GNAQ                | p.Q209P                  | GNAQ                | p.Q209P                  |         |                |                    |                |                    |
| 1028122 | GNAQ<br>ND<br>PLCB4 | p.Q209L<br>ND<br>p.D630Y | GNAQ<br>GNA11<br>ND | p.Q209L<br>p.Q209L<br>ND |         |                |                    |                |                    |
| 1029110 | GNAQ                | p.Q209P                  | GNAQ                | p.Q209P                  |         |                |                    |                |                    |
| 1021124 | GNA11               | p.Q209L                  | GNA11               | p.Q209L                  |         |                |                    |                |                    |

ND, not detected



**Supplementary Table 6. Percentage of patients with on-treatment ctDNA decrease or increase**

| On-treatment ctDNA change                                    | Week 5                 |                                    | Week 9                 |                                    |
|--------------------------------------------------------------|------------------------|------------------------------------|------------------------|------------------------------------|
|                                                              | No. of pts (%)<br>N=90 | No. of pts (%) with BOR=PD<br>N=44 | No. of pts (%)<br>N=94 | No. of pts (%) with BOR=PD<br>N=47 |
| Any ctDNA reduction (>0)                                     | 59 (66%)               | 25 (57%)                           | 67 (71%)               | 30 (64%)                           |
| ≥0.5 log ctDNA reduction (includes pts with ctDNA clearance) | 37 (41%)               | 12 (27%)                           | 42 (44%)               | 16 (34%)                           |
| ctDNA clearance                                              | 10 (11%)               | 2 (5%)                             | 12 (13%)               | 3 (13%)                            |
| <0.5 log ctDNA reduction                                     | 22 (24%)               | 13 (30%)                           | 25 (27%)               | 14 (30%)                           |
| ctDNA increase                                               | 31 (34%)               | 19 (43%)                           | 27 (29%)               | 17 (36%)                           |

**Supplementary Table 7. Best overall RECIST response for patients with ctDNA reduction**

| <b>Best overall response</b> | <b>No. of pts with <math>\geq 0.5</math> log ctDNA reduction (includes pts with ctDNA clearance)</b> | <b>No. of pts with <math>\geq 0.5</math> log ctDNA reduction (excludes pts with ctDNA clearance)</b> | <b>No. of pts with ctDNA clearance</b> | <b>No. of pts without ctDNA clearance</b> | <b>No. of pts with ctDNA increase</b> |
|------------------------------|------------------------------------------------------------------------------------------------------|------------------------------------------------------------------------------------------------------|----------------------------------------|-------------------------------------------|---------------------------------------|
| Partial Response             | 2                                                                                                    | 1                                                                                                    | 1                                      | 3                                         | 2                                     |
| Stable Disease               | 23                                                                                                   | 16                                                                                                   | 7                                      | 34                                        | 8                                     |
| Progressive Disease          | 16                                                                                                   | 13                                                                                                   | 3                                      | 44                                        | 17                                    |
| Non-Evaluable                | 1                                                                                                    | -                                                                                                    | 1                                      | 1                                         | -                                     |
